# Supplementary material
Source: PubMed Central journal article supplement (PMC1899952)
Supplement: molcellb_27_8_3023__1.pdf [file molcellb_27_8_3023__1.pdf]

## Chen et al Supplemental Figure S1

**Fig. S1: Cloning of porcine ADAM9, ADAM10 and ADAM17/TACE cDNA fragments.** cDNA fragments of porcine ADAM9 (930 bp), ADAM10 (725 bp), and ADAM17/TACE (943 bp) were amplified from total RNA isolated from the porcine renal epithelial cell line, LLCPKcl4, by RT-PCR and run on 1% agarose gels as detailed in *Methods and Materials* in the principal text. The specific RT-PCR products were cut out and purified from the gels, followed by cloning into pCRII-TOPO vector using the TOPO T-A Cloning Kit (Invitrogen), respectively. These cloned cDNA fragments were sequenced at the DNA Core at Vanderbilt University, and aligned with the cDNA sequences of ADAM9, ADAM10 and ADAM17/TACE of human and mouse for comparison (Accession numbers were NM\_003816, NM\_001110, and NM\_003183 for human; NM\_007404, NM\_007399, and NM\_009615 for mouse, respectively). The 930-bp ADAM9, 725-bp ADAM10, and 943-bp ADAM17/TACE of porcine origin are 92%, 95%, and 89% homologous to the corresponding human ADAMs and 85%, 91%, and 86% homologous to the corresponding mouse ADAMs. Also noted are the three additional nucleotides, AGT, which are present only in the mouse ADAM10 but absent in both porcine and human ADAM10 as indicated by dashed line “---”. The siRNA sequences used in the present study are indicated by bold type in red. The nucleotide differences within the siRNA sequences between porcine and human or mouse are underlined.

### The cDNA sequence of ADAM9 cloned from the porcine renal epithelial cell line, LLCPKcl4 cells:

|         |                                                                                             |
|---------|---------------------------------------------------------------------------------------------|
| Human   | CACGTCGGAGACATGACAGTGCACAGCTAGTTCTAAAGAAAGGTTTTGGTGGAACTGCAGGAATGGCATTGTG                   |
| Mouse   | CTCGTCGGAGACACGACAGTGCACAGTTGGTTTTGAAGAAAGGCTTTGGTGGAACTGCAGGAATGGCGTTTGTA                  |
| Porcine | CACGTCGGAGACATGACAGTGCACAGCTAGTTCTGAAGAAAGGGTTTTGGTGGGACTGCAGGAATGGCGTTTGTG                 |
| Human   | GGAACAGTGTGTTCAAGGAGCCACGCAGGCGGGATTAATGTGTTTGGACAAA <b>TCACTGTGGAGACATTTC</b> TTC          |
| Mouse   | GGAACAGTATGTTCAAGGAGCCACGCAGGTGGGATCAATGTGTTTGGGCAA <b>TCACTGTGGAGACATTTC</b> ATC           |
| Porcine | GGAACCGTGTGTTCAAGGAGTCATGCAGGCGGGATTAATGTGTTTGGGCGAA <b>TCACAGTGGAGAC</b> <u>CGTTTC</u> ATC |
| Human   | CATTGTTGCTCATGAATTGGGTCATAATCTTGAATGAATCACGATGATGGGAGAGATTGTTCTGTGGAGCAA                    |
| Mouse   | CATTGTTGCTCATGAATTGGGGCATAACCTTGAATGAATCATGATGATGGGAGAGAGTGTCTGTGGAGCAA                     |
| Porcine | CATCGTTGCTCATGAGTTGGGTCATAACCTTGAATGAATCATGATGATGGCAGAGACTGTTACTGTGGAGCAA                   |
| Human   | AGAGCTGCATCATGAATTCAGGAGCATCGGGTTCCAGAACTTTAGCAGTTGCAGTGCAGAGGACTTTGAGAAG                   |

Mouse AGAGCTGTATCATGAATTCAGGAGCATCCGGGTCAGAACTTTAGCAGTTGCAGTGCAGGAGGACTTTGAGAAG  
 Porcine AGAGCTGCATCATGAATTCAGGAGCATCTGGTTCCAGGAACTTTAGCACTTGCAGTGCAGAAGACTTTGAGAAG  
  
 Human TTAACCTTTAAATAAAGGAGGAACTGCCTTCTTAATATTCCAAAGCCTGATGAAGCCTATAGTGCTCCCTCCTG  
 Mouse TTAACGTTGAATAAGGGAGGAAGCTGCCTGCTTAACATCCCGAAGCCTGACGAAGCCTACAGCGCGCCCTCCTG  
 Porcine TTAACCTTTAAATAAAGGTGGAACTGCCTTCTGAATATTCCAAAGCCTGATGAGGCCTATAGTGCTCCTTTCTG  
  
 Human TGGTAATAAGTTGGTGGACGCTGGGGAAGAGTGTGACTGTGGTACTCCAAAGGAATGTGAATTGGACCCTTGCT  
 Mouse TGGTAATAAGCTGGTGGACCCTGGAGAGGAGTGTGACTGCGGCACAGCGAAGGAGTGTGAGGTGGACCCATGCT  
 Porcine TGGTAATAAACTGGTGGACCCAGGGGAAGAGTGTGACTGTGGTACTCCAAAGGAGTGTGAATTGGACCCTTGTT  
  
 Human GCGAAGGAAGTACCTGTAAGCTTAAATCATTGCTGAGTGTGCATATGGTACTGTTGTAAAGACTGTCGGTTC  
 Mouse GTGAAGGAAGCACTTGTAAAGCTCAAGTCAATGCTGAGTGTGCATATGGCGACTGTTGTAAAGATTGCCAGTTC  
 Porcine GTGAAGGAAGTACATGTAAACTTAAATCATCTGCTGAGTGTGCATATGGCGACTGTTGTCAAGACTGTTGGTTC  
  
 Human CTTCCAGGAGGTACTTTATGCCGAGGAAAAACCAGTGAGTGTGATGTTCCAGAGTACTGCAATGGTTCTTCTCA  
 Mouse CTTCCAGGAGGCTCCATGTGCAGAGGGAAAGACCAGTGAGTGTGATGTTCCCTGAGTACTGCAACGGTTCTTCTCA  
 Porcine CTTCCAGGAGGTACTTTGTGCCGAGGAAAAACCAATGAATGCGACGTTCCAGAGTATTGCAATGGTTCTTCTCA  
  
 Human GTTCTGTCCAGCCAGATGTTTTTATTGAGAAATGGATATCCTTGCCAGAATAACAAAGCCTATTGCTACAACGGCA  
 Mouse GTTCTGCCCGCCAGATGTCTTCATTGAGAAATGGATATCCTTGCCAGAACAGCAAAGCCTACTGCTACAATGGCA  
 Porcine GTTTTGCCAGCCAGATGTTTTTATTGAGAAATGGATATCCTTGCCAGAATAACAAAGCCTATTGTTACAATGGCA  
  
 Human TGTGCCAGTATTATGATGCTCAATGTCAAGTCATCTTTGGCTCAAAGCCAAAGGCTGCCCCAAAGATTGTTTC  
 Mouse TGTGCCAATATTATGACGCGCAGTGTCAAGTCATCTTTGGTTCAAAGGCTAAGGCTGCCCCAAGAGATTGCTTC  
 Porcine TGTGCCAGTATTATGATGCTCAGTGTCAAGTCATCTTTGGCTCAAAGCTAAGGCTGCCCCAAGAGATTGTTTC  
  
 Human ATTGAAGTGAATTCTAAAGGTGACAGATTTGGCAATTGTGGTTTTCTCTGGCAATGAATACAAGAAGTGTGCCAC  
 Mouse ATTGAAGTCAATTCTAAAGGTGACAGATTTGGCAACTGTGGTTTTCTCCGGCAGTGTGATACAAGAAGTGTGCCAC  
 Porcine ATTGATGTGAATTCCAAAGGTGACCGATTTGGCAATTGTGGTTTTCTCTGGCAATGAATATAAGAAGTGTGCCAC  
  
 Human TGGGAATGCTTTGTGTGGAAAGCTTCAGTGTGAGAATGTACAAGAGATACCTGTATTTGGAATTGTGCCTGCTA  
 Mouse TGGGAACGCGCTGTGTGGAAAGCTTCAATGCGAGAATGTACAGGACATGCCGGTGTGTTGGAATAGTACCAGCTA  
 Porcine TGGGAATGCTTTGTGTGGAAAGCTTCAGTGTGAGAATGTACAAGAAATGCCTGTATTTGGAATTGTGCCTGCTA  
  
 Human TTATTCAAACGCCTAGTCGAGGCACCAAATGTTGGGGTGTGG  
 Mouse TCATTGAGACACCCAGTCGAGGCACCAAATGCTGGGGTGTGG  
 Porcine TTATTGAGACTCCTGGGAGAGGCACCAAATGTTGGGGTGTGG

### The cDNA sequence of ADAM10 cloned from the porcine renal epithelial cell line, LLCPKcl4 cells

Human GTTAATTCTGCTCCTCTCCTGGGCGGCGGGGATGGGAGGTCAGTATGGAAATCCTTTAAATAAAATATATC**AGAC**  
 Mouse GTTAATTCTGCTCCTCTCCTGGGCGGCGGGGCTGGGAGGTCAGTATGGAAATCCTTTAAATAAAATATATT**AGAC**  
 Porcine GTTAATTCTGCTCCTCTCCTGGGCGGCGGGGCTGGGAGGTCAGTATGGAAATCCTTTAAATAAAATACATT**AGAC**  
  
 Human **ATTATGAAGGATTAT**CTTACAATGTGGATTCATTACACCAAAAACACCAGCGTGCCAAAAGAGCAGTCTCACAT  
 Mouse **ATTATGAAGGATTAT**CTTACAATGTGGATTCATTACACCAAAAACACCAGCGTGCCAAAAGAGCAGTCTCACAT  
 Porcine **ATTATGAAGGATTGT**CTTATGATGTGGATTCATTACACCAAAAACACCAGCGTGCCAAAAGAGCAGTTTCACAT  
  
 Human GAAGACCAATTTTTACGTCTAGATTTCCATGCCCATGGAAGACATTTCAACCTACGAATGAAGAGGGACACTTC  
 Mouse GAGGACCAGTTTTTACTTCTAGATTTCCATGCTCATGGAAGACAGTTCAACCTACGAATGAAGAGGGACACTTC  
 Porcine GAGGACCAGTTTTTACGTCTAAATTTCCATGCTCATGGAAGACATTTCAACCTACGAATGAAGAGGGACACTTC  
  
 Human CCTTTTTAGTGATGAATTTAAAGTAGAAACATCAAATAAAGTACTTGATTATGATACCTCTCATATTTTACTG  
 Mouse CCTTTTTAGTGATGAATTTAAAGTAGAAACATCAAATAAAGTACTTGATTATGATACCTCTCATATTTTACTG  
 Porcine CCTTTTTAGTGATGAATTTAGGGTGGAAACATCAAATAAAGTACTTGATTATGATACCTCTCATATTTTACTG

Human GACATATTTATGGTGAAGAAGGAAGTTTTAGCCATGGGTCTGTTATTGATGGAAGATTTGAAGGATTCATCCAG  
 Mouse GACATATTTATGGTGAAGAAGGAAGTTTTAGTCATGGGTCTGTCATTGATGGAAGATTTGAAGTTTTATCAAG  
 Porcine GACATATTTATGGTGAAGAAGGAAGTTTTAGCCATGGGTCTGTTATTGATGGAAGATTTGAAGGATTCATTCAG

Human ACTCGTGGTGGCACCATTTTTATGTTGAGCCAGCAGAGAGATATATTAAGACCGAACTCTGCCATTTCACTCTGT  
 Mouse ACTCGTGGTGGCAGCTTTTTACATTGAGCCAGCAGAGAGATACATTAAGATCGAATCCTGCCATTTCACTCTGT  
 Porcine ACTCATGGCGGCACATTTTTATATTGAGCCAGCAGAGAGATATATTAAGACCGAACTCTGCCATTTCACTCTGT

Human CATTTATCATGAAGATGATATTAACATATCCCCATAAAATACGGTCCTCAGGGGGGGCTGTGCAGATCATTCACTAT  
 Mouse CATTTATCATGAAGATGATATTAACATATCCCCATAAAATACGGCCACAGGGGGGGCTGTGCAGATCACTCCGTTT  
 Porcine CATTTATCATGAAGATGATATTAACATATCCCCATAAAATATGGTCCACAGGGGGGGCTGTGCAGATCATTCACTAT

Human TTGAAAGAATGAGGAAATACCAGATGACTGGTGTAGAGGAAGTAACACAGATACCTCAAGAAGAATGCTGCT  
 Mouse TTGAAAGGATGAGGAAGTACCAAATGACTGGAGTAGAGGAAGGAGCCCGGGCACATCCAGAGAAGCATGCTGCT  
 Porcine TTGAAAGGATGAGGAAGTACCAGATGACTGGTGTAGAAGAAGTAACACAGACACCTCAAGAAAAGCATGCTAAT

Human AAT---GGTCCAGAACTTCTGAGGAAAAACGTACAACCTTCAGCTGAAAAAATACTTGTGCTGCTTTTATATCCA  
 Mouse AGTAGTGGTCCCTGAGCTCCTGAGGAAAAACGCACAACCTCTGGCTGAAAGAAAATACTTGTGCTGCTTATATCCA  
 Porcine AAT---GGTCCAGAACTTCTGAGGAAAAACGTACAACCTTCAGCTGAAAAAATACTTGTGCTGCTTTTATATCCA

Human GACTGATCATTTGTTCTTTAAATATTACGGAACACGAGAAGCTGTGATTGCCAGATATCCA  
 Mouse GACAGATCACCTGTTCTTTAAATACTATGGAACACGAGAAGCTGTGATTGCTCAGATATCCA  
 Porcine GACTGATCATCTGTTCTTTAAATATTATGGAACACGAGAAGCTGTGATTGCCAGATATCCA

### The cDNA sequence of ADAM17 cloned from the porcine renal epithelial cell line, LLCPKcl4 cells

Human GCAGTCTCTCCTATTCCTGACCAGCGTGGTTTCCTTTTCGTGCTGGCGCCGCGACCTCCGGATGACCCGGGCTTCG  
 Mouse GCAGTCTCTCCTCATCCTGACCACCTTTGGTGCCTTTTCGTGCTGGCACCCCGACCTCCGGAGGAAGCAGGCTCTG  
 Porcine GCAGTCTCTCCTATTCCTGACCAGCTTGGTTTCCTATCGTGCTGGCGCCGCGACCCCGGACGAGCCGGGCTTCG

Human GCCCCCACCAGAGACTC**GAGAAGCTTGATTCTTTGC**TCTCAGACTACGATATTCTCTCTTTATCTAATATCCAG  
 Mouse GCTCCCATCCGCGACTT**GAGAAGCTTGATTCTTTGC**TCTCAGACTACGACATCCTCTCCTTAGCTAATATCCAG  
 Porcine GCTCCCCTCAGCGACTC**GAAAAGCTTGATTCTTTGC**TCTCAGACTACGACATCCTCTCTTTATCCAGCATTCCG

Human CAGCATTCCGGTAAGAAAAAGAGATCTACAGACTTCAACACATGTAGAAAACACTACTAACTTTTTTCAGCTTTGAA  
 Mouse CAGCACTCCATAAGGAAAAGGGATCTACAGTCTGCGACACACTTAGAAAACATTACTAACTTTTTTCAGCTTTGAA  
 Porcine CAGCACTCCGTAAGGAAAAGGGATCTGCAGGCCTCAACACACCTAGAGACACTACTAACTTTTTTCAGCCTTGAA

Human AAGGCATTTTTAAATTATACCTGACATCAAGTACTGAACGTTTTTTCACAAAATTTCAAGGTCGTGGTGGTGGATG  
 Mouse AAGACATTTTTAAATTATACCTGACATCAAGTACCGAACGTTTTTTCACAAAATTTGAGAGTCGTGGTGGTGGACG  
 Porcine CAGGCATTTTTAAATTATACCTGACATCAAGTACTGAACGTTCTCCAGAATTTCAAGTCTGTGGTGGTGGATG

Human GTAAAAACGAAAGCGAGTACACTGTAAAATGGCAGGACTTCTTCACTGGACACGTGGTTGGTGGAGCCTGACTCT  
 Mouse GGAAAGAAGAAAGCGAGTACAGCGTGAAGTGGCAGAACTTCTTCACTGGTGGTGGTGGAGCCTGACTCT  
 Porcine GGGAAAGATGAAAGTGAGTACCCCGTCAAGTGGCAGGACTTCTTCACTGGACACGTGGTTGGTGGAACTGACTCT

Human AGGGTTCTAGCCACATAAGAGATGATGATGTTATAATCAGAATCAACACAGATGGGGCCGAATATAACATAGA  
 Mouse AGGGTTCTAGCCACATAGGAGATGATGATGTTACAGTGAGAATCAACACAGATGGGGCAGAATATAACGTAGA  
 Porcine AGGGTTCTCGCCACATAGGAGATGATGATATTACAGTAAGAATCAACACAGATGGGGCAGAATATAATATAGA

Human GCCACTTTGGAGATTTGTTAATGATACCAAAGACAAAAGAATGTTAGTTTATAAATCTGAAGATATCAAGAATG  
 Mouse GCCACTTTGGAGGTTTGTCAATGATACTAAAGATAAACGAATGCTGGTGTATAAGTCTGAAGATATCAAGGATT  
 Porcine GCCACTTTGGAGACTAATTAATGATACTAAAGACAAAAGAGTGTAGTTTATAAGTCTGAAGATATCAAGAATG

Human TTTACGTTTTGCAGTCTCCAAAAGTGTGTGGTTATTTAAAAGTGGATAATGAAGAGTTGCTCCAAAAGGGTTA  
 Mouse TTTACGTTTTGCAGTCTCCAAAAGTATGTGGTTATTTAAAATGCAGATAGTGAAGAGCTGCTTCCAAAAGGGCTC  
 Porcine TTTTCGTTTTGCAGTCTCCAAAAGTGTGTGGTTATATAAAGGCGGATAATGAAGAGTTGCTTCCAAAAGGGCTA

|         |                                                                              |
|---------|------------------------------------------------------------------------------|
| Human   | GTAGACAGAGAACCACCTGAAGAGCTTGTTTCATCGAGTGAAAAGAAGAGCTGACCCAGATCCCATGAAGAACAC  |
| Mouse   | ATAGACAGAGAGCCATCTGAAGAGTTTGTTTCGTTCGAGTGAAGAGACGAGCTGAACCTAACCCCTTGAAGAATAC |
| Porcine | GTAGACAGAGAGCCGCCTGATGAGCTTGTTTCACCGGGTGAAGAGAAGAGCCGACCCCAATCCCCTGAGGAACAC  |
| Human   | GTGTAAATTATTGGTGGTAGCAGATCATCGCTTCTACAGATACATGGGCAGAGGGGAAGAGAGTACAACCTACAA  |
| Mouse   | TTGTAAATTACTGGTGGTAGCAGATCATCGATTTTATAAATACATGGGCCGTGGAGAAGAGAGCACCCTACAA    |
| Porcine | GTGTAAATTATTGGTGGTGGCAGATCATCGCTTTTATAAGTACATGGGCAGAGGGGAAGAGAGCACGACCACAA   |
| Human   | ATTACTTAATAGAGCTAATTGACAGAGTTGATGACATCTATCGGAACACTTCATGGGATAATGCAGGTTTTAAA   |
| Mouse   | ATTACTTAATAGAGCTAATTGACCGAGTTGATGACATATACCGGAACACGTCGTGGGATAATGCAGGTTTTAAA   |
| Porcine | ACTACCTGATAGAGCTAATTGACAGAGTTGATGACATCTATCGGAACACTTCATGGGACAATGCAGGTTTTAAA   |
| Human   | GGCTATGGAATACAGATAGAGCAGATTTCGATTCTCAAGTCTCCACAAGAGGTAAAACCTGGTGAAAAGCACTA   |
| Mouse   | GGGTATGGAGTGCAGATAGAGCAGATTTCGAATTCTCAAGTCTCCACAAGAGGTAAAACCTGGTGAAAAGCACTT  |
| Porcine | GGTTATGGAATACAGATAGAGCAGATTTCGATTCTCAAGTCTCCACAAGAGGTAAAACCTGGTGAAAAGGCACTA  |
| Human   | CAACATGGCAAAAAGTTACCCAAATGAAGAAAAGGATGCTTGGGATGTGAAGATG                      |
| Mouse   | CAATATGGCAAAAAGTTTCCCAAACGAAGAGAAGGATGCTTGGGATGTGAAGATG                      |
| Porcine | CAATATGGCAAAAAGTTACCCAAATGAAGAAAAGGATGCTTGGGATGTGAAGATG                      |
